# Supplementary material
Source: ML conference proceedings conference paper supplement (https://proceedings.mlr.press/v80/sheldon18a.html)
Supplement: Supplementary file [file sheldon18a-supp.pdf]

## A. Definition of Partial Computation

Formally, we can write  $f_{i \rightarrow \ell}$ , the partial computation from  $v_i$  to  $v_\ell$ , via the recurrence:

$$\begin{aligned} f_{i \rightarrow \ell}(v_{0:i}) &= \varphi_\ell(u_{ij}(v_{0:i}))_{j \in A_\ell}, \\ u_{ij}(v_{0:i}) &= \begin{cases} v_j & \text{if } j \leq i \\ f_{i \rightarrow j}(v_{0:i}) & \text{if } j > i \end{cases} \end{aligned}$$

Here,  $u_{ij}(v_{0:i})$  will equal  $v_j$  for all  $j$ . For  $j \leq i$ , the value is obtained directly from the inputs to  $f_{i \rightarrow \ell}$ . For  $j > i$ , the value of  $u_{ij}$  is computed according to the partial computation from  $i$  to  $j$ .

## B. Proof of Proposition 3

*Proof.* We write  $f_{0 \rightarrow j}$  as a function of  $\epsilon$  using the two given Taylor expansions:

$$\begin{aligned} f_{0 \rightarrow j}(x + \epsilon) &= \varphi_j(f_{0 \rightarrow k}(x + \epsilon)), \\ &= \varphi_j\left(v_k + (f_{0 \rightarrow k}(x + \epsilon) - v_k)\right), \\ &= v_j + Q\left(f_{0 \rightarrow k}(x + \epsilon) - v_k\right), \\ &= v_j + Q(R(\epsilon)), \end{aligned}$$

where we used the Taylor expansion of  $\varphi_j$  in Line 3 and the Taylor expansion of  $f_{0 \rightarrow k}$  in Line 4. The last expression is a power series in  $\epsilon$ , and, since  $f_{0 \rightarrow j}$  is analytic (the composition of two analytic functions is analytic), it is necessarily the Taylor series expansion of  $f_{0 \rightarrow j}$  about  $x$ .  $\square$

## C. Truncated Forward Algorithm

The truncated forward algorithm is the following variant of the forward algorithm for discrete HMMs, where  $N$  is an upper bound placed on the population size:

1. Set  $\alpha_0(0) = 1$  and  $\alpha_0(n) = 0$  for  $n = 1$  to  $N$ .
2. For  $k = 1$  to  $K$ 
  - (a) Compute the transition matrix  $P_k$ , where  $P_k(n, n') = \Pr(n_k = n' \mid n_{k-1} = n)$  for all  $n, n' \in \{0, \dots, N\}$  (details below)
  - (b) For  $n' = 0$  to  $N$ , set

$$\alpha_k(n') = p(y_k \mid n') \sum_{n=0}^N \alpha_{k-1}(n) P_k(n, n')$$

3. The likelihood is  $\sum_{n=0}^N \alpha_K(n)$

Step 2(b) takes  $O(N^2)$  time. Step 2(a) may take  $O(N^3)$  or  $O(N^2 \log N)$  time, depending on how it is implemented.

Observe that  $n_k$  is the sum of two random variables:

$$n_k = z_k + m_k, \quad z_k := \sum_{i=0}^{n_k-1} z_{k,i}$$

and we must reason about their convolution to construct the transition probabilities. Specifically, the  $n$ th row of  $P_k$  is the convolution of the first  $N$  values of the distribution  $p(z_k \mid n_{k-1} = n)$  and the first  $N$  values of  $p(m_k)$ :

$$P_k(n, n') = \sum_{z=0}^N \Pr(z_k = z \mid n_{k-1} = n) \Pr(m_k = n' - z)$$

Let us assume we can compute the first  $N$  values of each distribution in  $O(N)$  time. Then the time to compute each row of  $P_k$  is  $O(N^2)$  if we use the direct convolution formula above, but  $O(N \log N)$  if we use the fast Fourier transform (FFT) for convolution, making the overall procedure either  $O(KN^3)$  or  $O(KN^2 \log N)$ . While the FFT is superior in terms of running time, it is inaccurate in many cases (see Section 5).

```
def A(s, k):
    if k < 0: return 1.0

    # This allows constant to be constructed in log space
    const = GDual.const( y[k] * np.log(rho[k]) - gammaln(y[k] + 1), as_log=True )

    return (s**y[k]) * const * \
        diff( lambda u: Gamma(u, k), s*(1 - rho[k]), y[k] )

def Gamma(u, k):
    F = lambda u: offspring_pgf( u, theta_offspring[k-1] )
    G = lambda u: immigration_pgf( u, theta_immigration[k] )
    return A(F(u), k-1) * G(u)

log_likelihood = log( A(1.0, K-1) )
```

Figure 5. Code for AD based forward algorithm.
